# 1 Characterization of the Root-Associated Microbiome Provides Insights into 2 Endemism of *Thymus* Species Growing in the Kazdagi National Park

3  
4 Gökçe Ercan<sup>1\*</sup>, Muzaffer Arıkan<sup>2,3\*</sup>, İ. Sırrı Yüzbaşıoğlu<sup>4</sup>, F. Elif Çepni Yüzbaşıoğlu<sup>5#</sup>

5  
6 <sup>1</sup>Department of Molecular Biology and Genetics, Institute of Graduate Studies in Sciences, Istanbul  
7 University, Istanbul, Türkiye

8 <sup>2</sup>Department of Medical Biology, School of Medicine, Istanbul Medipol University, Istanbul, Türkiye

9 <sup>3</sup>Regenerative and Restorative Medicine Research Center (REMER), Research Institute for Health Sciences  
10 and Technologies (SABITA), Istanbul Medipol University, Istanbul, Türkiye

11 <sup>4</sup>Department of Biology, Faculty of Science, Istanbul University, Istanbul, Türkiye

12 <sup>5</sup>Department of Molecular Biology and Genetics, Faculty of Science, Istanbul University, Istanbul, Türkiye

13 \*These authors contributed equally to this work

14 #Corresponding author: F. Elif Çepni Yüzbaşıoğlu, Department of Molecular Biology and Genetics, Faculty  
15 of Science, Istanbul University, 34134 Vezneciler, Istanbul, Turkey. Phone: +902124555700 Fax:  
16 +902124555811. Email: [ecepnuyuzbasioglu@istanbul.edu.tr](mailto:ecepnuyuzbasioglu@istanbul.edu.tr)

## 17 18 19 Abstract

20 Plant associated microbiomes have a large impact on the fitness of the plants in the particular  
21 environmental conditions. The root associated microbiomes are shaped by the interactions between the  
22 microbial community members, their plant host, and environmental factors. Hence, further  
23 understanding of the composition and functions of the plant root associated microbiomes can pave the  
24 way for the development of more effective conservation strategies for endangered endemic plants. Here,  
25 we characterized the bacterial and fungal microbiomes in bulk and rhizosphere soil of an endemic and  
26 a non-endemic *Thymus* species from Kazdagi National Park, Türkiye, *Thymus pulvinatus* and *Thymus*  
27 *longicaulis* subsp. *chaubardii*, respectively, by 16S rRNA gene and ITS amplicon sequencing. Our  
28 findings revealed no significant differences in alpha diversity between plant species and soil types.  
29 However, we found that the bacterial microbiome profiles differentiate not only *Thymus* species but also  
30 soil types while fungal microbiome profiles show distinct profiles particularly between the species in  
31 beta diversity. *Proteobacteria*, *Actinobacteria*, *Acidobacteria*, and *Chloroflexi* members form the core  
32 bacterial microbiome while the fungal core microbiome consists of *Ascomycota* and *Basidiomycota*  
33 members in both *Thymus* species. Moreover, we identified the association of the bacterial taxa  
34 contributing to the biogeochemical cycles of carbon and nitrogen and providing the stress resistance  
35 with the rhizosphere soil of endemic *T. pulvinatus*. In addition, functional predictions suggested distinct  
36 enriched functions in rhizosphere soil samples of the two plant species. Also, employing an exploratory  
37 integrative analysis approach, we determined the plant species-specific nature of transkingdom  
38 interactions in two *Thymus* species.

39  
40 **Keywords:** plant endemism, *Thymus*, rhizosphere, soil, microbiome, amplicon sequencing

41  
42  
43  
44

## 45 1. Introduction

46 Plants are key components of global biodiversity and essential for ecosystem sustainability; however,  
47 thousands of plant species face an increased risk of extinction worldwide (1). Endemic plants which  
48 thrive only in a specific geographic area are more prone to extinction (2) thus require particular attention  
49 when developing and establishing plant protection strategies. Clearly, a better understanding of the  
50 mechanisms of plant survival and growth is of paramount importance for successful biodiversity  
51 conservation.

52  
53 Plants host diverse but taxonomically structured communities of microorganisms that colonize different  
54 plant tissues and the surroundings and play essential roles in plant health and growth (3). The  
55 rhizosphere is the zone of soil around the plant roots and composed of several soil microorganisms (4).  
56 Rhizosphere-associated microbiota play an important role in plant health, nutrient uptake, secondary  
57 metabolite production, immunity, and stress tolerance (5). Recent studies suggest a significant  
58 association between the plant microbiome and endemism. One of these studies focused on *Anthurium*  
59 species and found that the endemic species had special bacterial communities that supported the plant  
60 compared to other species (6). In another study, endemic *Hoffmannseggia doellii* growing at an altitude  
61 of 2800-3600 m in Atacama Desert was reported to have more diverse microbial communities compared  
62 to soils of other plants in the same region and bulk soil (7).

63  
64 Approximately 11707 vascular plant species are known to grow in Türkiye, 3649 of which are endemic  
65 species (8). Kazdagi, a national park and one of the important biodiversity centers of Turkey, hosts about  
66 800 plant species, 30 of which are endemic. There has been extensive research on the biodiversity and  
67 endemic plants in Kazdagi (9–11). However, to our knowledge, there is no study focusing on the  
68 potential relationship between plant microbiome and endemism for endemic plant species in Kazdagi.

69  
70 In this study, we collected rhizosphere soil (RS) and bulk soil (BS) samples for two *Thymus* species,  
71 namely *T. longicaulis* subsp. *chaubardii* and *T. pulvinatus*. Although growing in the same location and  
72 environmental conditions with the other in Kazdagi, *T. pulvinatus* is a local endemic species. By  
73 applying 16S rRNA gene and internal transcribed spacer (ITS) sequencing to identify both bacterial and  
74 fungal microbiomes in soil samples from both species, we tested the following hypotheses: i) RS of  
75 endemic *T. pulvinatus* hosts a distinct bacterial and fungal community composition as a potential  
76 contributor to its endemism. ii) Functional profile differences of bacterial microbiome between two  
77 *Thymus* species are involved in different survival characteristics. iii) Transkingdom interactions differ  
78 between endemic and non-endemic *Thymus* species.

## 81 2. Materials and Methods

### 83 2.1. Sampling Area and Sample Collection

84 Sampling was carried out on August 29<sup>th</sup>, 2022, in Kazdagi National Park (Edremit, Balıkesir). Plant  
85 species identification of the materials was performed by Dr. Sırrı Yüzbaşıoğlu. The voucher specimens  
86 were preserved at the Herbarium of the Faculty of Pharmacy (ISTE), Istanbul University. *T. longicaulis*  
87 subsp. *chaubardii* samples (ISTE1183756) were collected near Kapidag watchtower stairs (39° 40'  
88 53''N - 26° 54' 58''E) at 1360 m height while *T. pulvinatus* samples (ISTE118375) were collected  
89 below Kapidag watchtower (39° 40' 55''N - 26° 54' 55''E) at 1350 m height. Biological triplicates  
90 (different plants) of each plant species were selected for the study. Rhizosphere soil (loosely attached to  
91 the plant roots) and bulk soil (surrounding the plant roots) were collected from 5-10 cm depth for each

92 plant. Samples were stored at 4°C during the transfer to the laboratory, and frozen at -80°C when arrived  
93 at the laboratory.

94

### 95 *2.2. DNA Extraction*

96 DNA extractions were performed using QIAGEN DNeasy PowerSoil Pro Kit (Qiagen, Hilden,  
97 Germany) with modifications to the manufacturer's protocol. In brief, to obtain rhizosphere DNA, plant  
98 roots with the attached soil were placed on sterile filter paper, cut into small pieces, and then suspended  
99 in 5 mL of filter-sterilized PBS. After 2 minutes of vortex, roots were removed and 1000 µL of the liquid  
100 sample was transferred to the PowerBead Pro Tube. Next, samples were centrifuged at 15.000 x g for 1  
101 minute and supernatant discarded, which was repeated three times. After that, the manufacturer's  
102 protocol was followed without any modification. DNA samples were stored at -20 °C until library  
103 preparation.

104

### 105 *2.3. Library Preparation and Amplicon Sequencing*

106 16S rRNA and ITS gene sequencing were performed in a two-step PCR amplification protocol. In 16S  
107 rRNA gene amplifications, universal bacterial primers F-5'-CCTACGGGNGGCWGCAG-3' and R-  
108 5'-GACTACHVGGGTATCTAATCC-3' were used targeting V3-V4 region of 16S rRNA gene (12)  
109 while ITS1F (5'-CTTGGTCATTTAGAGGAAGTAA-3') and ITS2R (5'-  
110 GCTGCGTTCTTCATCGATGC-3') primers (13) were used for the investigation of fungal diversity.  
111 Amplicon libraries were prepared by following Illumina's 16S rRNA metagenomic sequencing library  
112 preparation and fungal metagenomic sequencing protocol. MiSeq platform and 2x300 paired end  
113 sequencing kit were used for amplicon sequencing. A total of 24 amplicon libraries were sequenced,  
114 along with an extraction negative control and 2 no-template PCR controls.

115

### 116 *2.4. Bioinformatics and statistical analyses*

117 Paired end reads were demultiplexed based on their unique barcodes. Trimmomatic (14) was used for  
118 primer and barcode trimming and quality filtering steps. Filtered and quality checked paired end  
119 sequences were merged using FLASH (15). DADA2 pipeline (16) was used for taxonomic assignments  
120 and generation of ASV abundance tables. SILVA (v138) (17) and UNITE (v8.3) (18) databases were  
121 employed for bacterial and fungal communities, respectively. Potential contaminant sequences in the  
122 samples were filtered by the decontam (19). Only ASVs present in at least 2 samples and assigned at  
123 phylum level were included in the downstream analyses. Samples were rarefied to minimum sampling  
124 depth before performing alpha and beta diversity analyses which were performed using Phyloseq (20).  
125 Principal coordinate analysis (PCoA) using a dissimilarity matrix based on Euclidean distance was  
126 applied to examine the variation between samples in bacterial and fungal community compositions.  
127 Differentially abundant taxa between sample groups were examined using LefSe (21). Functional  
128 profiles of bacterial communities in samples were predicted using the Tax4Fun2 (22) and differentially  
129 abundant KEGG functional genes were determined using LefSe. Data integration analysis using latent  
130 components (DIABLO) (23) was used to integrate 16S rRNA gene and ITS sequencing results and  
131 perform an exploratory examination of transkingdom interactions. Pheatmap (24) was used for  
132 construction of heatmaps using Euclidean distance as the similarity measure and clustering samples  
133 based on the "complete" method. The ggplot2 (25) was used for visualizations.

134

135 Statistical analyses were conducted in R 3.6.1. A Kruskal-Wallis test was used for alpha diversity  
136 comparisons. Permutational multivariate analysis of variance (PERMANOVA) from the vegan package  
137 was used for beta diversity comparisons. Differential abundance analyses of bacterial and fungal  
138 communities were performed with Linear discriminant analysis Effect Size (LEfSe) and tested using  
139 Kruskal-Wallis test and using Linear Discriminant Analysis (LDA) as implemented in LefSe.

140  
141  
142  
143  
144  
145  
146  
147  
148  
149  
150  
151  
152  
153  
154  
155  
156  
157  
158  
159

### 2.5. Data availability

The raw 16S rRNA gene and ITS amplicon sequencing data produced in this study have been deposited in the NCBI Sequence Read Archive database, accession no. PRJNA943177.

## 3. Results

Soil samples were collected in the Edremit province of Türkiye (see “Methods” section). Both rhizosphere soil samples (named as LR and PR for *T. longicaulis* subsp. *chaubardii* and *T. pulvinatus*, respectively) and bulk soil samples (named as LS and PS for *T. longicaulis* subsp. *chaubardii* and *T. pulvinatus*, respectively) were obtained. Three samples were collected for each group which yielded a total number of 12 samples. Both 16S rRNA gene and ITS amplicon sequencing based microbiome analysis were performed for all soil samples (Figure 1). A total of 1.141.078 paired end bacterial amplicon sequences from the V3-V4 region of 16S rRNA gene and 1.568.574 paired end fungal amplicon sequences from the ITS region were obtained from all amplicon libraries. The 16S rRNA gene and ITS sequences generated 4664 and 3335 amplicon sequence variants (ASVs), respectively. The 16S rRNA gene ITS samples were rarefied to minimum sampling depth, 4085 and 15310 reads, respectively. After decontamination, filtering, and rarefaction, 1083 bacterial and 829 fungal ASVs were used for downstream analyses.

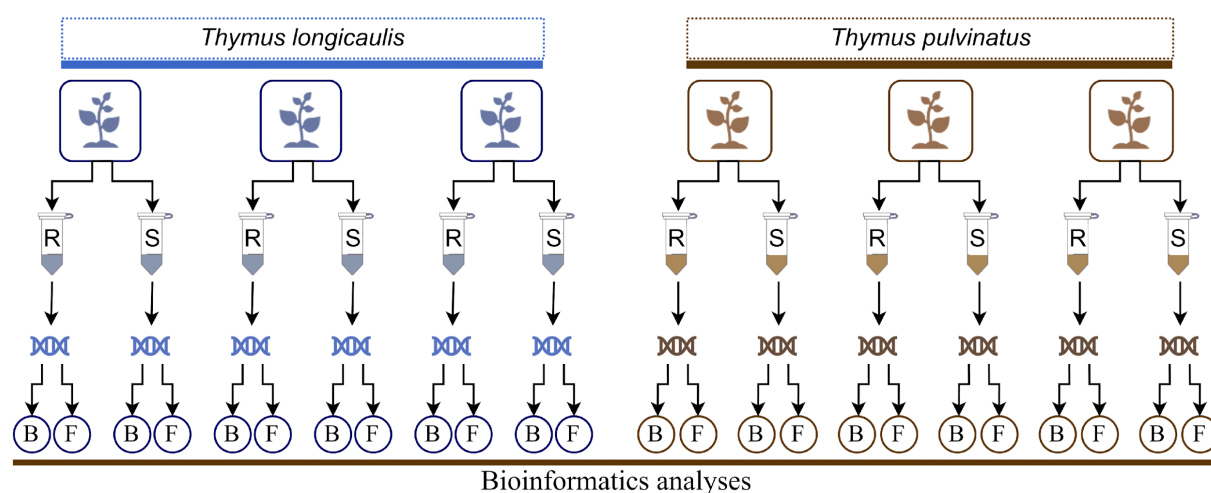

160  
161  
162  
163  
164

**Figure 1.** Experimental overview. Rhizosphere (R) and bulk soil samples (S) were collected from 3 plants for each *Thymus* species. Then, DNA extractions were performed for each soil sample. Next, bacterial (B) and fungal (F) microbiomes were profiled by amplicon sequencing. Finally, soil microbiome data was investigated using bioinformatics analyses.

165  
166  
167  
168  
169  
170  
171  
172  
173  
174  
175

### 3.1. Bacterial and fungal microbiome compositions

The bacterial ASVs assigned at phylum level showed that 10 most abundant phyla were *Proteobacteria*, *Actinobacteria*, *Acidobacteria*, *Chloroflexi*, *Bacteroidetes*, *Myxococcota*, *Verruimicrobia*, *Gemmatimonadetes*, *Planctomycetes* and *Firmicutes* (Figure 2A). Among these phyla, *Proteobacteria* (35%), *Actinobacteria* (33%), *Acidobacteria* (9%) and *Chloroflexi* (9%) were dominant across all samples on average. For fungi, 10 most abundant phyla included *Ascomycota*, *Basidiomycota*, *Mortierellomycota*, *Chytridiomycota*, *Mucoromycota*, *Olpidiomycota*, *Glomeromycota*, *Rozellomycota*, *Monoblepharomycota*, *Kickxellomycota* and *Aphelidiomycota*. Taxonomic analysis of the fungal community showed that on average, *Ascomycota* (72%) and *Basidiomycota* (19%) were dominant across all samples (Figure 2B).

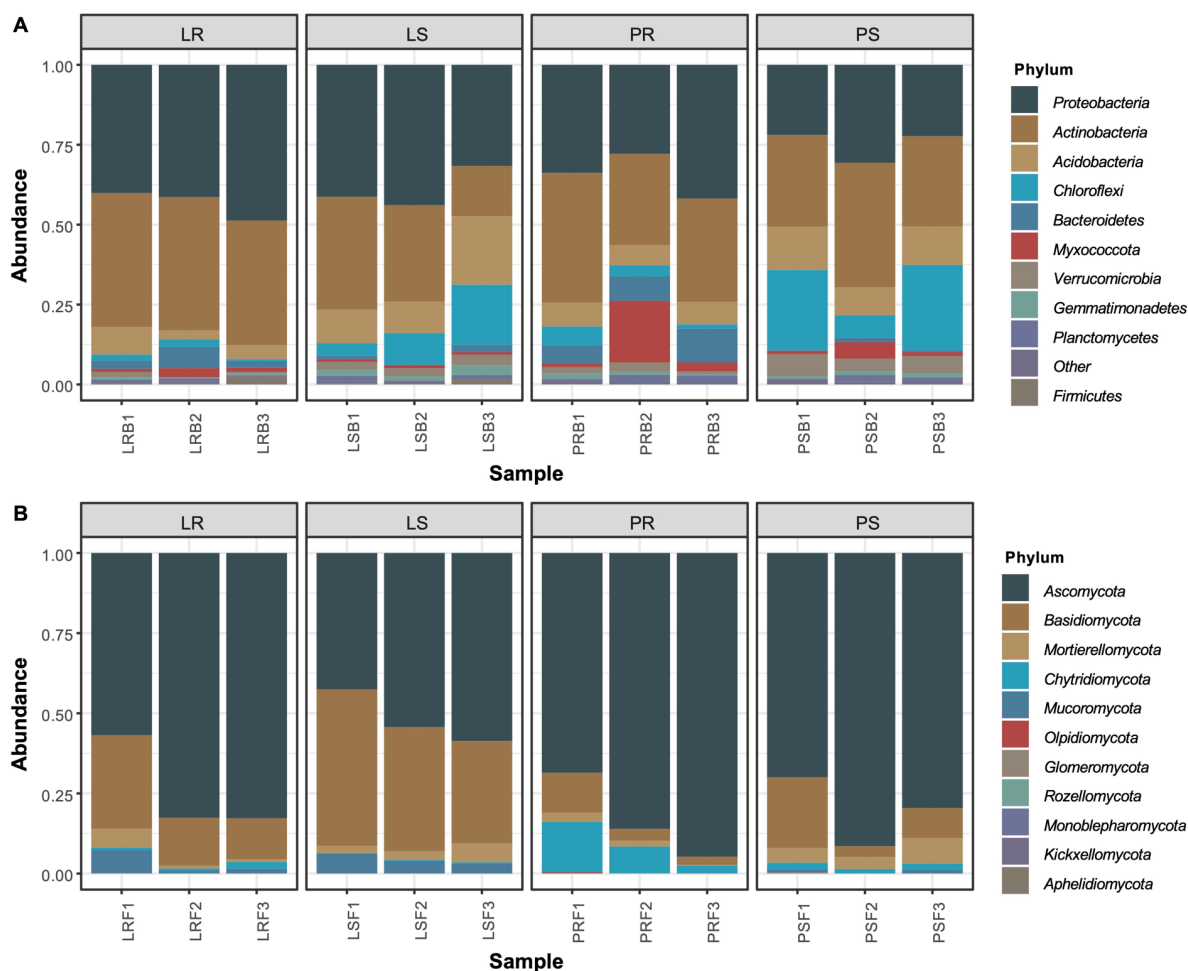

176  
 177 **Figure 2.** The top 10 most common bacterial (A) and fungal (B) phyla in soil microbiome samples. Phyla that  
 178 were not among 10 most common taxa were grouped into “Other”. Each bar represents relative abundance  
 179 distribution for a sample.

180  
 181 *3.2. Structural diversity measures*  
 182 Bacterial and fungal communities were evaluated using richness and diversity indices. There were no  
 183 significant differences in alpha diversity indices (Chao1, Shannon, InvSimpson, Fisher) between  
 184 *Thymus* species or rhizosphere and bulk soil samples for bacterial (Figure 3A) and fungal microbiomes  
 185 (Figure 3B).  
 186

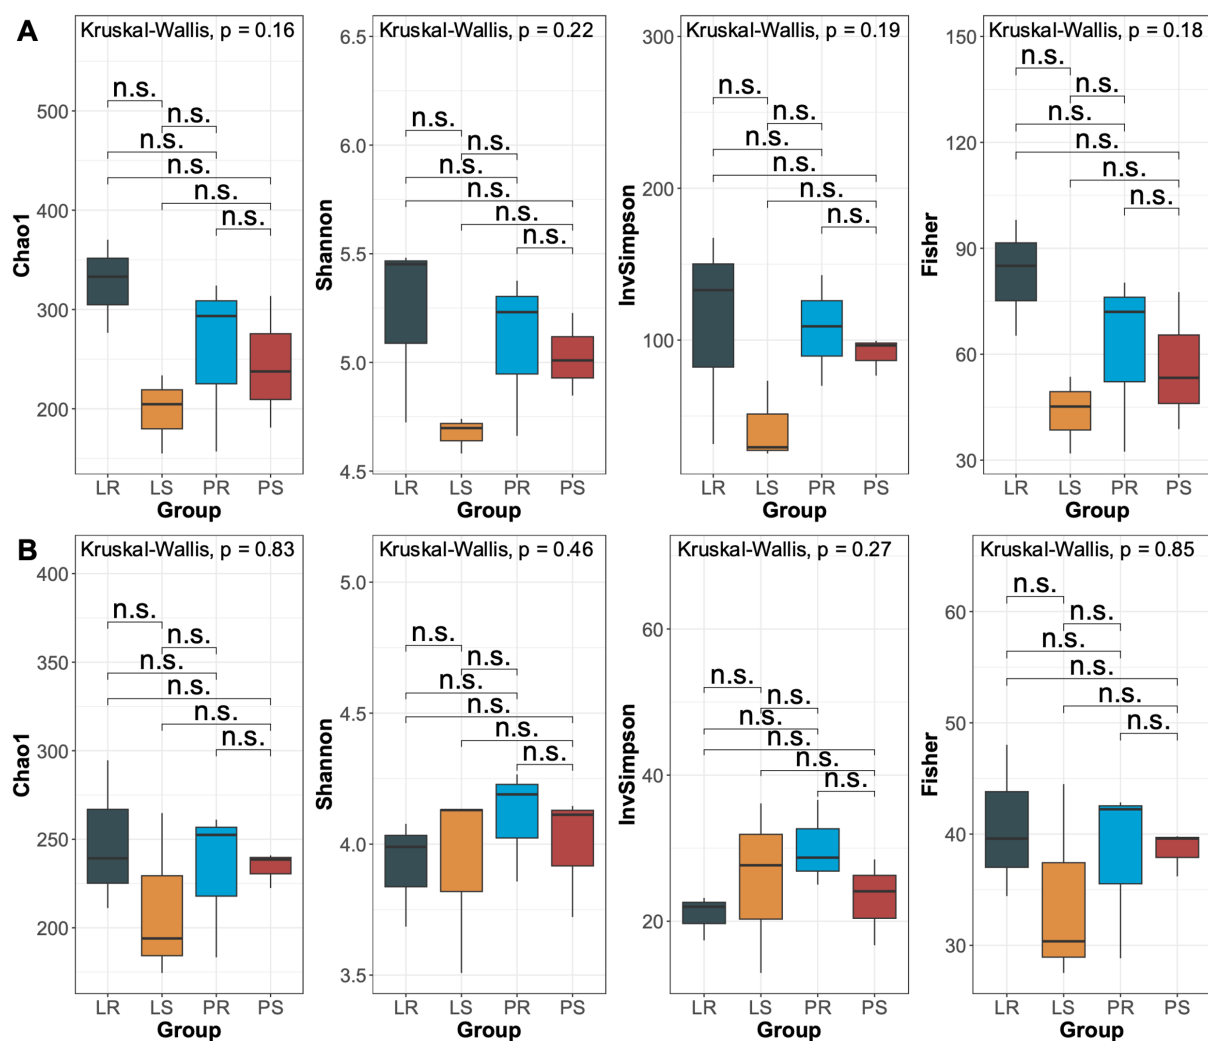

187  
 188 **Figure 3.** Alpha diversity (Chao1, Shannon, InvSimpson, Fisher) comparisons of bacterial (A) and fungal  
 189 microbiome samples between study groups. Median estimates compared across study groups using the Kruskal-  
 190 Wallis test. Boxes represent the interquartile range, lines indicate medians, and whiskers indicate the range. n.s.:  
 191 not significant.

192  
 193 To determine the variation between samples, PCoA using a dissimilarity matrix based on Euclidean  
 194 distance was applied where axis 1 and axis 2 explained 52.1% and 50.6% variances among four sample  
 195 types for bacterial and fungal microbiomes, respectively (Figure 4A and B). Bacterial microbiome  
 196 samples clustered clearly according to not only the *Thymus* species but also rhizosphere and bulk soil  
 197 types. Fungal microbiome samples clustered according to the *Thymus* species but separation between  
 198 rhizosphere and bulk soil samples was not clear. PERMANOVA was used to test whether the  
 199 samples cluster beyond what was expected by sampling variability. The results showed a significant  
 200 difference between four sample types for both bacterial microbiome and fungal microbiome.

201

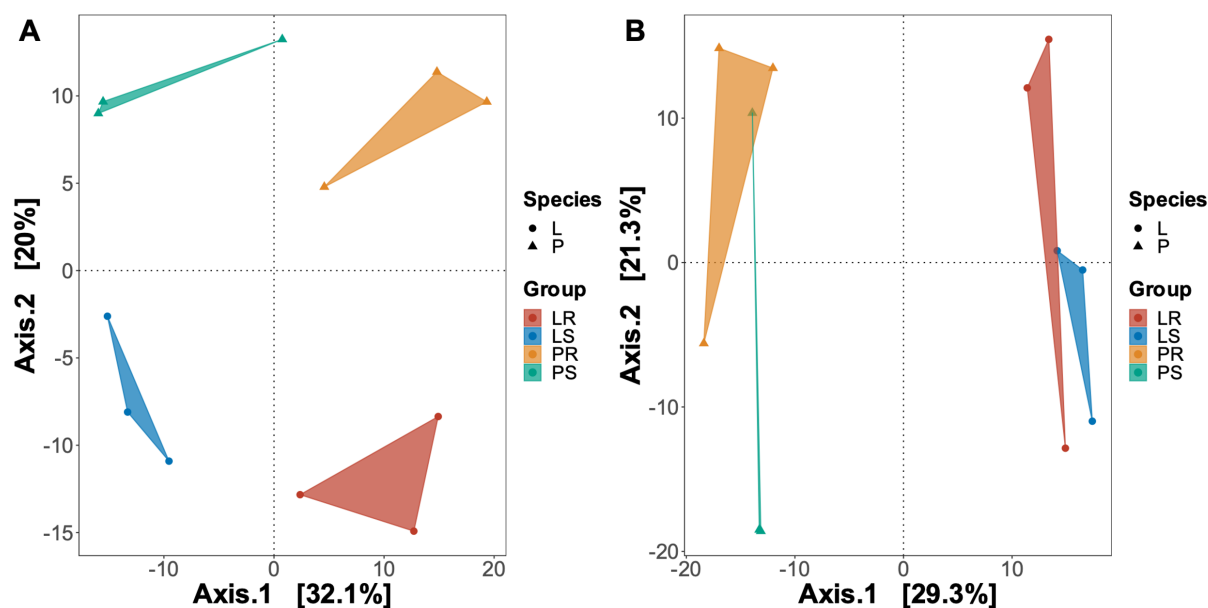

202  
 203 **Figure 4.** Beta diversity comparisons of bacterial (A) and fungal (B) microbiome samples between study groups.  
 204 PCoA was calculated using euclidean distance. Color is indicative of the study group. Shape is indicative of  
 205 *Thymus* species (L for *T. longicaulis* subsp. *chaubardii* and P for *T. pulvinatus*).  
 206

### 207 3.3. Differential abundance analysis

208 To determine which microbial taxa were significantly associated with sample groups, we performed  
 209 differential abundance using LEfSe. For the bacterial community, we identified 20 differentially  
 210 abundant bacterial genera with LDA greater than 4 enriched in different study groups (Figure 5A). Five  
 211 genera were enriched in the rhizosphere soil of *T. longicaulis* subsp. *chaubardii*, including  
 212 *Pseudomonas*, *Mycobacterium*, *Nocardioides*, *Streptomyces* and *Kribella* while rhizosphere soil of  
 213 endemic *T. pulvinatus* included enriched unclassified *Acetobacteraceae*, *Sphingomonas*, *Blastocatella*  
 214 and *Marmoricola*. For the fungal community, we identified 7 fungal genera with LDA greater than 4  
 215 enriched in LS and PR groups (Figure 5B). Among these, 5 genera (*Saitozyma*, unclassified  
 216 *Tylosporaceae*, *Geminibasidium*, *Solicoccozyma*, unclassified *Leotiomycetes*) were enriched in bulk soil  
 217 samples of *T. longicaulis* subsp. *chaubardii* (LS) while 2 genera (*Comoclathris* and unclassified  
 218 *Chaetothyriales*) were enriched in the rhizosphere soil of endemic *T. pulvinatus*.  
 219

220 The heatmap and hierarchical clustering of the differentially abundant bacterial genera revealed  
 221 separated clusters of four sample types (Figure 5C). Interestingly, rhizosphere and bulk soil samples of  
 222 both *Thymus* species were further clustered together. On the other hand, the heatmap and hierarchical  
 223 clustering of the differentially abundant fungal genera revealed separated clusters according to the  
 224 *Thymus* species (Figure 5D). The results indicate the variable characteristics of different kingdoms  
 225 according to the soil sample type and plant species.  
 226

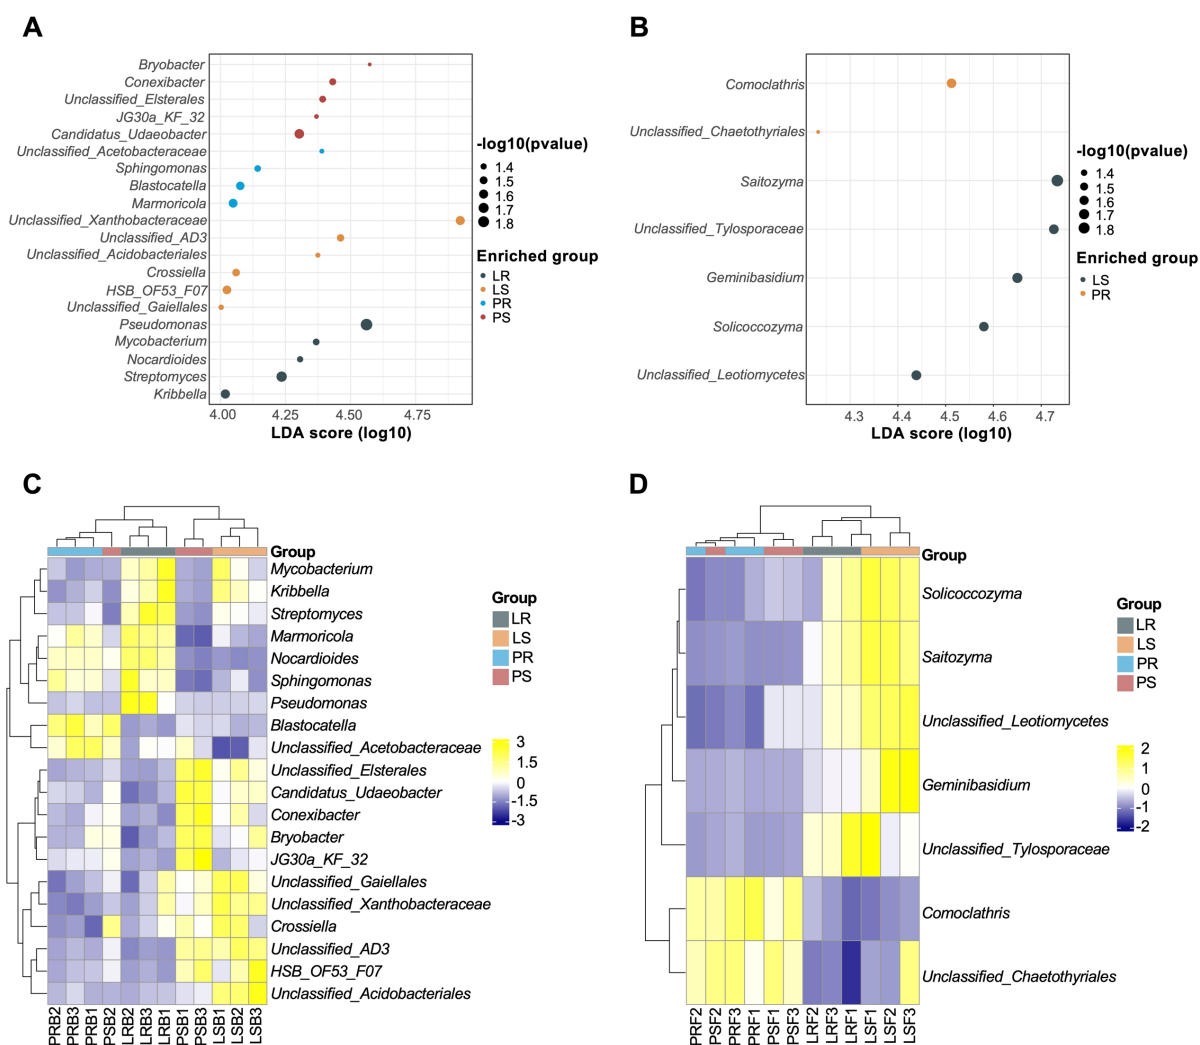

227  
 228 **Figure 5.** Abundance distribution of differentially abundant bacterial (A) and fungal (B) genera in the soil samples  
 229 detected by LefSe. LDA effect size (LEfSe) was calculated using LDA with p-value cutoff = 0.05 with LDA score  
 230 > 4 of the genera. Dot sizes are indicative of -log<sub>10</sub> (p value) while color is indicative of the study group with the  
 231 enriched differentially abundant genera. Heatmap and hierarchical cluster analysis of bacterial (C) and fungal (D)  
 232 genera measured using Euclidean distance and “complete” method based on the relative abundances of  
 233 differentially abundant genera between study groups.  
 234

235 *3.4. Predicted functional profile of bacterial microbiomes*

236 To investigate the functional profile of the bacterial community in the soil samples, functional gene  
 237 content was predicted and enumerated using Tax4Fun2. We used LefSe to determine differentially  
 238 abundant KEGG functions (LDA>3) between rhizosphere and bulk soil samples for each *Thymus*  
 239 species separately. The results revealed both overlapping and distinct functions separating rhizosphere  
 240 and bulk soil samples in two *Thymus* species.



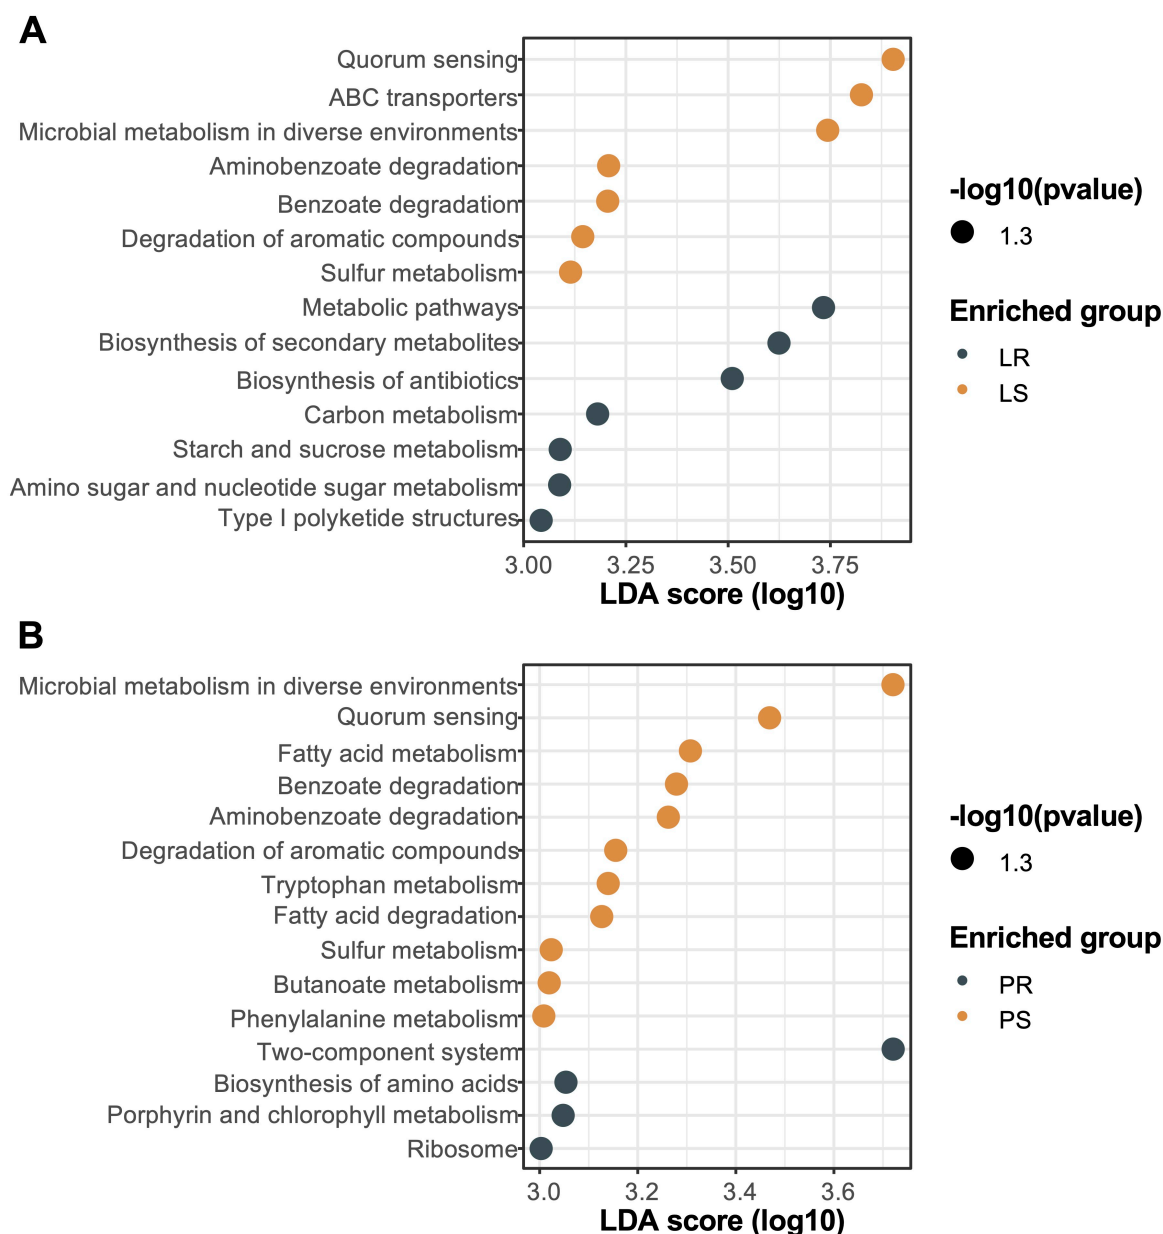

241  
 242 **Figure 6.** Tax4Fun2 predictions of the functional profile of *T. longicaulis* subsp. *chaubardii* (A) and *T. pulvinatus*  
 243 (B) microbiome samples detected by LEfSe. LDA effect size (LEfSe) was calculated using LDA with p-value  
 244 cutoff = 0.05 with LDA score > 3 of the genera. Dot sizes are indicative of -log<sub>10</sub> (p value) while color is indicative  
 245 of the study group with the enriched differentially abundant genera.

246  
 247 Quorum sensing, microbial metabolism in diverse environments, benzoate degradation, aminobenzoate  
 248 degradation, degradation of aromatic compounds and sulfur metabolism were enriched in the bulk soils  
 249 of both *Thymus* species. On the other hand, KEGG functions enriched in rhizosphere soils of the two  
 250 *Thymus* species did not have any overlapping. We identified metabolic pathways, biosynthesis of  
 251 secondary metabolites, biosynthesis of antibiotics, carbon metabolism, starch and sucrose metabolism,  
 252 amino sugar and nucleotide sugar metabolism and Type I polyketide structures were enriched in the  
 253 rhizosphere soil of *T. longicaulis* subsp. *chaubardii* (LS) (Figure 6A) while two-component system,  
 254 biosynthesis of amino acids, porphyrin and chlorophyll metabolism and ribosome were enriched in the  
 255 rhizosphere soil of endemic *T. pulvinatus* (Figure 6B).

256  
 257

258 3.5. Integrative analysis of bacterial and fungal microbiomes  
 259 We used DIABLO to integrate 16S rRNA gene and ITS sequencing results and perform an exploratory  
 260 examination of transkingdom interactions. The results revealed positive and negative correlations  
 261 between bacterial and fungal ASVs in each *Thymus* species separately (Figure 7).  
 262

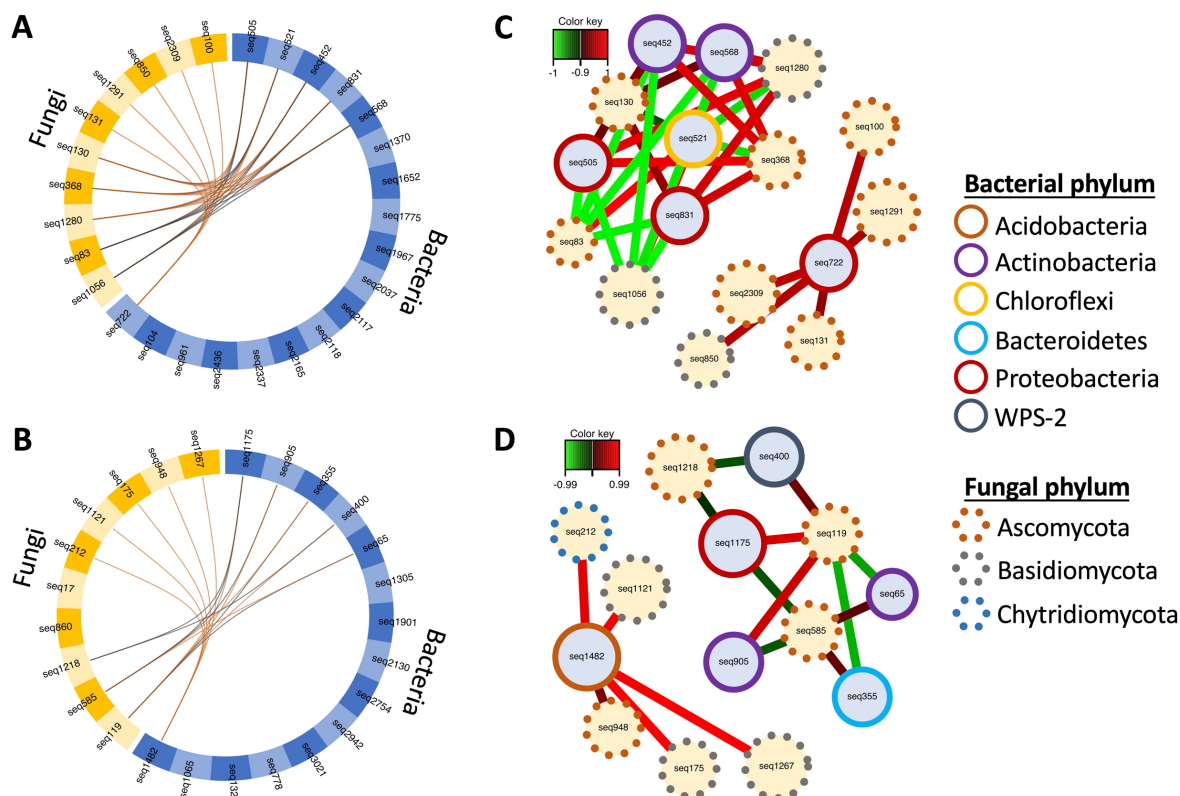

263  
 264 **Figure 7.** Circos plot representing the correlations between soil bacterial ASVs (blue side quadrant) and fungal  
 265 ASVs (orange side quadrant) in *T. longicaulis* subsp. *chaubardii* (A) and *T. pulvinatus* (B). Positive and negative  
 266 correlations (greater than 0.7) are illustrated with orange and black lines, respectively. Relevance network of  
 267 bacterial ASVs and fungal ASVs in *T. longicaulis* subsp. *chaubardii* (C) and *T. pulvinatus* (D). Each node  
 268 represents a selected ASV with the fill color indicating its type (light blue for bacterial ASVs and light yellow for  
 269 fungal ASVs). Phylum level taxonomic assignments of bacterial and fungal ASVs are indicated with node line  
 270 colors. The color of the edges represents positive or negative correlations as indicated in the color key.  
 271

272 In *T. longicaulis* subsp. *chaubardii*, we determined a strong positive correlation between bacterial ASV  
 273 assigned to unclassified *Acetobacteraceae* and fungal ASVs assigned to *Didymella*, unclassified  
 274 *Dermateaceae*, *Pseudolachnea*, *Cystobasidium* and *Alternaria* (Figure 7A). In *T. pulvinatus*, bacterial  
 275 ASV assigned to *Bryobacter* was positively correlated with fungal ASVs assigned to *Sonoraphlyctis*,  
 276 unclassified *Basidiomycota*, unclassified *Ascomycota*, *Rhizopogon* and *Tricholoma* (Figure 7B). Thus,  
 277 bidirectional correlations between bacterial and fungal taxa were also species-specific. Altogether, our  
 278 data show a bidirectional relationship between bacterial and fungal taxa that mutually influence each  
 279 other in a species-specific way.

280  
 281

#### 282 4. Discussion

283 In this study, we characterized the bacterial and fungal microbiomes of two *Thymus* species from  
 284 Türkiye using 16S rRNA gene and ITS amplicon sequencing. We revealed that bacterial microbiome  
 285 profiles differentiate not only plant species but also soil types (rhizosphere and bulk soils) while fungal

286 microbiome profiles showed more distinct profiles between plant species. We identified discriminatory  
287 bacterial and fungal taxa between the plant species and soil types. Moreover, we showed the species-  
288 specific and overlapping functional profile changes between soil types. In addition, we applied an  
289 exploratory integrative approach and determined the species-specific nature of transkingdom  
290 interactions in two *Thymus* species.

291  
292 Bacterial community profiles showed the *Proteobacteria*, *Actinobacteria*, *Acidobacteria* and  
293 *Chloroflexi* as the most abundant phyla in rhizosphere and bulk soil samples. In the previous study on  
294 the bacterial diversity in the rhizosphere of *T. zygis* growing in the Sierra Nevada National Park (Spain)  
295 reported *Proteobacteria*, *Actinobacteria*, *Acidobacteria*, and *Gemmatimonadetes* as the dominant phyla  
296 (26) which is consistent with our findings. In a previous study examining the fungal diversity of *Thymus*  
297 species, it was revealed that the cultured fungal isolates mainly consisted of the phylum *Ascomycota*  
298 (27). Similarly, our results revealed that *Ascomycota* was the dominant fungal phylum in our samples.  
299 Alpha diversity of bacterial and fungal communities did not show any significant differences between  
300 study groups while beta diversity analysis revealed significant differences between four sample types  
301 for both bacterial and fungal microbiome samples. However, it should be noted that the fungal  
302 microbiome samples mainly clustered based on plant species and clustering on the basis of soil type was  
303 less distinguishing. On the other hand, bacterial microbiome samples showed distinct clusters for each  
304 sample type indicating importance of both plant species and soil type on the bacterial community.

305  
306 Differential abundance analysis revealed that unclassified *Acetobacteraceae*, *Sphingomonas*,  
307 *Blastocatella* and *Marmoricola* were the bacterial genera most strongly associated with the rhizosphere  
308 soil of endemic *T. pulvinatus*. *Acetobacteraceae* and *Sphingomonas* members are known to metabolize  
309 diverse nutrients and play an important role in nitrogen fixation which makes them abundant in plant  
310 roots (28, 29). *Sphingomonas* can also metabolize hydrocarbons with differently organized genes than  
311 genera of *Pseudomonas* and are found to promote plant growth under different abiotic stress conditions  
312 (30, 31). The higher abundance of *Blastocatella* has been previously associated to the high content of  
313 soil total organic carbon (32) and as a member of *Acidobacteria* to have a potential role in the turnover  
314 and stability of soil organic carbon (33). *Marmoricola* can produce leucine aminopeptidase and chitinase  
315 that provides stress resistance in plants (34). Also, *Candidatus Udaeobacter* is an important member of  
316 *T. pulvinatus* bulk soil samples, unlike other samples. *Candidatus Udaeobacter*, which is largely  
317 unexplored soil bacterium, has been reported to be responsible for the hydrogen cycle and show  
318 multidrug resistance (35). These findings mainly point to the association of *T. pulvinatus* with the  
319 bacterial genera that are contributors to carbon fixation, hydrogen cycling and nitrogen metabolism and  
320 provide stress resistance to the plants. Moreover, rhizosphere and soil samples belonging to *T. pulvinatus*  
321 had enriched Gram-negative bacterial genera while rhizosphere and soil samples belonging to *T.*  
322 *longicaulis* subsp. *chaubardii* were mostly associated with the increased abundance of Gram-positive  
323 bacterial genera, especially in rhizosphere soil samples. Gram-negative bacteria are known to use and  
324 be dependent on plant-derived carbon sources, while Gram-positive bacteria use carbon sources derived  
325 from soil organic matter (36). Based on this, Gram-negative bacteria enrichment in *T. pulvinatus*  
326 samples may indicate a higher plant-microbiome dependency. In contrast to bacteria, only a few fungal  
327 genera differed in relative abundance between study groups; *Saitozyma*, unclassified *Tylosporaceae*,  
328 *Geminibasidium*, *Solicoccozyma* and unclassified *Leotiomyces* were enriched in bulk soil samples of  
329 *T. longicaulis* subsp. *chaubardii* (LS) while *Comoclathris* and unclassified *Chaetothyriales* were  
330 enriched in the rhizosphere soil of endemic *T. pulvinatus*. *Chaetothyriales* have been reported as plant  
331 symbionts and transmitted by seed (37). *Chaetothyriales* are capable of producing swainsonine which  
332 is an indolizidine alkaloid that causes severe toxicity in livestock feeding with swainsonine containing  
333 plants (38). Also, calystegines produced as a plant secondary metabolite are known to enhance the

334 toxicity of plants with swainsonine which is only produced by endophytic fungi (39, 40). Because *T.*  
335 *pulvinatus* is a local endemic and critically endangered species, *Chaetothyriales* enrichment in its  
336 rhizosphere soil may be due to a protection mechanism. *Comoclathris* strains isolated from different  
337 plants and geographic areas are found to have a whitening effect by producing the same active  
338 metabolites. This metabolite, comoclathrin, is a tyrosinase inhibitor (41). Tyrosinase inhibitors are  
339 shown to be potential antibacterial agents (42) so the presence of *Comoclathris* may be involved in  
340 protection mechanisms or recruitment of bacteria to the roots of *T. pulvinatus*.

341  
342 We compared the predicted functional profiles of rhizosphere and bulk soil types in two *Thymus* species  
343 separately to determine both differences and overlaps in enriched KEGG functions. Biosynthesis of  
344 secondary metabolites, biosynthesis of antibiotics, carbon metabolism, starch and sucrose metabolism,  
345 amino sugar and nucleotide sugar metabolism and Type I polyketide structures were enriched in the  
346 rhizosphere soil of *T. longicaulis* subsp. *chaubardii* while two-component system, biosynthesis of amino  
347 acids, porphyrin and chlorophyll metabolism and ribosome were enriched in the rhizosphere soil of  
348 endemic *T. pulvinatus*. The overlapping enriched functions of bulk soil samples have included quorum  
349 sensing (QS), microbial metabolism in diverse environments, benzoate degradation, aminobenzoate  
350 degradation, degradation of aromatic compounds and sulfur metabolism, whereas the rhizosphere soils  
351 of the 2 *Thymus* species did not have any overlapping enriched functions. In our results, contrary to the  
352 other studies, QS enrichment was in bulk soil instead of rhizosphere soil. Previous studies have indicated  
353 that the rhizosphere microbiome may vary depending on the different developmental stages of the plant  
354 (43–45) or season associated functional shifts (45, 46). The plant samples used in our study were  
355 collected near the end of the flowering period. Therefore, QS enrichment in bulk soil rather than  
356 rhizosphere soil may be due to the developmental stage of our plant samples. Moreover, two-component  
357 systems which are enriched in PR samples, are signal transduction systems that enable bacteria to sense,  
358 respond, and adapt to changes. Histidine kinases in quorum sensing mechanisms are part of two-  
359 component systems so although QS appears to be enriched in the soil, signal transduction systems are  
360 enriched in the rhizosphere of *T. pulvinatus*. Plants attract microbes through their tissues majorly by  
361 producing chemical signals and products such as amino acids. Presence of amino acids in the roots  
362 provides microbial community richness at the rhizosphere. It is known that microbial compounds can  
363 increase plant efflux of amino acids and contribute to microbial recruitment to the plant tissues (47).  
364 Enrichment of biosynthesis of amino acids in PR samples may be used to take up microbes from soil  
365 during different developmental stages and stress factors to provide plants survival. These functional  
366 profile differences indicate that the rhizosphere of endemic *Thymus* species mostly consists of specific  
367 bacterial groups that can function in plant protection and survival mechanisms while the rhizosphere of  
368 non-endemic species mostly consists of typical soil bacterial components.

369  
370 We also evaluated bidirectional correlations between bacterial and fungal ASVs to identify a highly  
371 correlated transkingdom signature discriminating rhizosphere and bulk soil in each *Thymus* species  
372 separately. We identified a strong positive correlation between bacterial ASV assigned to  
373 *Acetobacteraceae* family of *Proteobacteria* and fungal ASVs assigned to *Ascomycota* and  
374 *Basidiomycota* in *T. longicaulis* subsp. *chaubardii* while another bacterial ASV assigned to *Bryobacter*  
375 family of *Proteobacteria* was positively correlated with fungal ASVs assigned to *Ascomycota*,  
376 *Basidiomycota*, and *Chytridiomycota* in *T. pulvinatus*. These findings indicate a bidirectional  
377 relationship between bacterial and fungal taxa that mutually influence each other in a species-specific  
378 manner. It should be noted that interaction related to *T. pulvinatus* samples was fewer and showed less  
379 complexity than *T. longicaulis* related interactions.

380

381 In conclusion, our study presents an overview of differences and similarities between the root associated  
382 microbiome profiles of two *Thymus* species, namely *T. longicaulis* subsp. *chaubardii* and *T.*  
383 *pulvinatus*. Supporting our hypotheses, our results provide a basis for future research on the plant-  
384 microbiome interactions in respect of plant endemism and contribute to the efforts of developing better  
385 conservation strategies for endemic plants.

386

387

### 388 **Acknowledgements**

389 We thank Prof. Dr. Fatih Satil (Balıkesir University) for guiding us to locate the plant species. This work  
390 was supported by the Scientific Research Projects Coordination Unit of Istanbul University (Project  
391 number: FYL-2022-39046).

392

393

### 394 **Conflicts of Interest**

395 The authors declare no conflicts of interest.

396

397

### 398 **Author contributions**

399 Conception and Design: GE, MA, FEÇY; Sample Collection and Processing: GE, MA, İSY, FEÇY;  
400 Data Analysis: GE, MA; Data Interpretation: GE, MA, FEÇY; Manuscript Writing – Original Draft:  
401 GE, MA, FEÇY; Review & Editing: GE, MA, FEÇY. All authors read and approved the final  
402 manuscript.

403

404

### 405 **References**

- 406 1. Bernardo HL, Goad R, Vitt P, Knight TM. 2020. Nonadditive effects among threats on rare plant  
407 species. *Conserv Biol* 34:1029–1034.
- 408 2. Bellard C, Leclerc C, Leroy B, Bakkenes M, Veloz S, Thuiller W, Courchamp F. 2014.  
409 Vulnerability of biodiversity hotspots to global change. *Glob Ecol Biogeogr* 23:1376–1386.
- 410 3. Trivedi P, Batista BD, Bazany KE, Singh BK. 2022. Plant–microbiome interactions under a  
411 changing world: responses, consequences and perspectives. *New Phytol* 234:1951–1959.
- 412 4. Philippot L, Raaijmakers JM, Lemanceau P, Van Der Putten WH. 2013. Going back to the roots:  
413 The microbial ecology of the rhizosphere. *Nat Rev Microbiol* 11:789–799.
- 414 5. Mendes R, Garbeva P, Raaijmakers JM. 2013. The rhizosphere microbiome: Significance of  
415 plant beneficial, plant pathogenic, and human pathogenic microorganisms. *FEMS Microbiol Rev*  
416 37:634–663.
- 417 6. Andrade PAM de, de Souza AJ, Lira SP, Assis MA, Berlinck RGS, Andreote FD. 2021. The  
418 bacterial and fungal communities associated with *Anthurium* ssp. leaves: Insights into plant  
419 endemism and microbe association. *Microbiol Res* 244.
- 420 7. Maldonado JE, Gaete A, Mandakovic D, Aguado-Norese C, Aguilar M, Gutiérrez RA, González  
421 M. 2022. Partners to survive: *Hoffmannseggia doellii* root-associated microbiome at the  
422 Atacama Desert. *New Phytol* 234:2126–2139.
- 423 8. Bozyel ME, Merdamert-Bozyel E, Benek A, Turu D, Yakan MA, Canlı K. 2021. Ethnobotanical  
424 Uses of Liliaceae s.s. and Colchicaceae Taxa in Turkey. *Int J Innov Approaches Sci Res* 5:163–  
425 174.
- 426 9. Satil F. 2009. Threatening Factors on Plant Diversity of Kazdağı (IDA Mountain) National Park  
427 in Turkey and Suggestions for Conservation. *Biotechnol Biotechnol Equip* 23:208–211.
- 428 10. Güngör Ş. 2011. Measuring plant species diversity in alpine zones: A case study at the Kazdağı

- 429 National Park, in Turkey. *Arch Biol Sci* 63:1147–1156.
- 430 11. Deniz D, Selvi S. 2021. Kazdağı Milli Parkı'nın (Edremit/Balıkesir) Çalı ve Ağaç Florası. *Afyon*  
431 *Kocatepe Univ J Sci Eng* 21:1005–1015.
- 432 12. Klindworth A, Pruesse E, Schweer T, Peplies J, Quast C, Horn M, Glöckner FO. 2013.  
433 Evaluation of general 16S ribosomal RNA gene PCR primers for classical and next-generation  
434 sequencing-based diversity studies. *Nucleic Acids Res* 41:e1–e1.
- 435 13. White TJ, Bruns T, Lee S, Taylor J. 1990. Amplification and direct sequencing of fungal  
436 ribosomal RNA genes for phylogenetics, p. 315–322. *In* *PCR Protocols*. Elsevier.
- 437 14. Bolger AM, Lohse M, Usadel B. 2014. Trimmomatic: a flexible trimmer for Illumina sequence  
438 data. *Bioinformatics* 30:2114–2120.
- 439 15. Magoc T, Salzberg SL. 2011. FLASH: fast length adjustment of short reads to improve genome  
440 assemblies. *Bioinformatics* 27:2957–2963.
- 441 16. Callahan BJ, McMurdie PJ, Rosen MJ, Han AW, Johnson AJA, Holmes SP. 2016. DADA2:  
442 High-resolution sample inference from Illumina amplicon data. *Nat Methods* 13:581–583.
- 443 17. Quast C, Pruesse E, Yilmaz P, Gerken J, Schweer T, Yarza P, Peplies J, Glöckner FO. 2013. The  
444 SILVA ribosomal RNA gene database project: Improved data processing and web-based tools.  
445 *Nucleic Acids Res* 41:590–596.
- 446 18. Nilsson RH, Larsson K-H, Taylor AFS, Bengtsson-Palme J, Jeppesen TS, Schigel D, Kennedy  
447 P, Picard K, Glöckner FO, Tedersoo L, Saar I, Kõljalg U, Abarenkov K. 2019. The UNITE  
448 database for molecular identification of fungi: handling dark taxa and parallel taxonomic  
449 classifications. *Nucleic Acids Res* 47:D259–D264.
- 450 19. Davis NM, Proctor DM, Holmes SP, Relman DA, Callahan BJ. 2018. Simple statistical  
451 identification and removal of contaminant sequences in marker-gene and metagenomics data.  
452 *Microbiome* 6:226.
- 453 20. McMurdie PJ, Holmes S. 2013. phyloseq: an R package for reproducible interactive analysis and  
454 graphics of microbiome census data. *PLoS One* 8:e61217.
- 455 21. Segata N, Izard J, Waldron L, Gevers D, Miropolsky L, Garrett WS, Huttenhower C. 2011.  
456 Metagenomic biomarker discovery and explanation. *Genome Biol* 12:R60.
- 457 22. Wemheuer F, Taylor JA, Daniel R, Johnston E, Meinicke P, Thomas T, Wemheuer B. 2020.  
458 Tax4Fun2: Prediction of habitat-specific functional profiles and functional redundancy based on  
459 16S rRNA gene sequences. *Environ Microbiomes* 15:1–12.
- 460 23. Rohart F, Gautier B, Singh A, Lê Cao K-A. 2017. mixOmics: An R package for 'omics feature  
461 selection and multiple data integration. *PLOS Comput Biol* 13:e1005752.
- 462 24. Kolde R. 2018. Package 'pheatmap.'
- 463 25. Wickham H. 2009. ggplot2. Springer New York, New York, NY.
- 464 26. Pascual J, Blanco S, García-López M, García-Salamanca A, Bursakov SA, Genilloud O, Bills  
465 GF, Ramos JL, Van Dillewijn P. 2016. Assessing bacterial diversity in the rhizosphere of  
466 *Thymus zygis* growing in the Sierra Nevada National Park (Spain) through culture-dependent  
467 and independent approaches. *PLoS One* 11:1–19.
- 468 27. Masumi S, Mirzaei S, Zafari D, Kalvandi R. 2015. Isolation, identification and biodiversity of  
469 endophytic fungi o *Thymus*. *Prog Biol Sci* 5:43–50.
- 470 28. Reis VM, Teixeira KR dos S. 2015. Nitrogen fixing bacteria in the family Acetobacteraceae and  
471 their role in agriculture. *J Basic Microbiol* 55:931–949.
- 472 29. Asaf S, Numan M, Khan AL, Al-Harrasi A. 2020. Sphingomonas: from diversity and genomics  
473 to functional role in environmental remediation and plant growth. *Crit Rev Biotechnol* 40:138–  
474 152.
- 475 30. Pinyakong O, Habe H, Omori T. 2003. The unique aromatic catabolic genes in sphingomonads  
476 degrading polycyclic aromatic hydrocarbons (PAHs). *J Gen Appl Microbiol*.

- 477 31. Luo Y, Wang F, Huang Y, Zhou M, Gao J, Yan T, Sheng H, An L. 2019. Sphingomonas sp.  
478 Cra20 increases plant growth rate and alters rhizosphere microbial community structure of  
479 Arabidopsis thaliana under drought stress. *Front Microbiol* 10.
- 480 32. Shao K, Bai C, Cai J, Hu Y, Gong Y, Chao J, Dai J, Wang Y, Ba T, Tang X, Gao G. 2019.  
481 Illumina Sequencing Revealed Soil Microbial Communities in a Chinese Alpine Grassland.  
482 *Geomicrobiol J* 36:204–211.
- 483 33. Chen J, He F, Zhang X, Sun X, Zheng J, Zheng J. 2014. Heavy metal pollution decreases  
484 microbial abundance, diversity and activity within particle-size fractions of a paddy soil. *FEMS*  
485 *Microbiol Ecol* 87:164–181.
- 486 34. Zhang X, Myrold DD, Shi L, Kuzyakov Y, Dai H, Thu Hoang DT, Dippold MA, Meng X, Song  
487 X, Li Z, Zhou J, Razavi BS. 2021. Resistance of microbial community and its functional  
488 sensitivity in the rhizosphere hotspots to drought. *Soil Biol Biochem* 161:108360.
- 489 35. Willms IM, Rudolph AY, Göschel I, Bolz SH, Schneider D, Penone C, Poehlein A, Schöning I,  
490 Nacke H. 2020. Globally Abundant “ Candidatus Udaeobacter” Benefits from Release of  
491 Antibiotics in Soil and Potentially Performs Trace Gas Scavenging . *mSphere* 5.
- 492 36. Fanin N, Kardol P, Farrell M, Nilsson MC, Gundale MJ, Wardle DA. 2019. The ratio of Gram-  
493 positive to Gram-negative bacterial PLFA markers as an indicator of carbon availability in  
494 organic soils. *Soil Biol Biochem* 128:111–114.
- 495 37. Neyaz M, Gardner DR, Creamer R, Cook D. 2022. Localization of the Swainsonine-Producing  
496 Chaetothiales Symbiont in the Seed and Shoot Apical Meristem in Its Host Ipomoea carnea.  
497 *Microorganisms* 10.
- 498 38. Cook D, Gardner DR, Pfister JA. 2014. Swainsonine-containing plants and their relationship to  
499 endophytic fungi. *J Agric Food Chem* 62:7326–7334.
- 500 39. Mendonça FS, Filho GBS, Chaves HAS, Aires LDA, Braga TC, Gardner DR, Cook D, Buriel  
501 MT. 2018. Detection of swainsonine and calystegines in Convolvulaceae species from the  
502 semiarid region of Pernambuco. *Pesqui Vet Bras* 38:2044–2051.
- 503 40. Binaglia M, Baert K, Schutte M, Serafimova R. 2019. Overview of available toxicity data for  
504 calystegines. *EFSA J* 17:1–13.
- 505 41. Georgousaki K, González-Menéndez V, Tormo JR, Tsafantakis N, Mackenzie TA, Martín J,  
506 Gumeni S, Trougakos IP, Reyes F, Fokialakis N, Genilloud O. 2022. Comoclathrin, a novel  
507 potent skin-whitening agent produced by endophytic Comoclathris strains associated with  
508 Andalusia desert plants. *Sci Rep* 12:1–12.
- 509 42. Yuan Y, Jin W, Nazir Y, Fercher C, Blaskovich MAT, Cooper MA, Barnard RT, Ziora ZM.  
510 2020. Tyrosinase inhibitors as potential antibacterial agents. *Eur J Med Chem* 187:111892.
- 511 43. Chaparro JM, Badri D V., Vivanco JM. 2014. Rhizosphere microbiome assemblage is affected  
512 by plant development. *ISME J* 8:790–803.
- 513 44. Edwards JA, Santos-Medellín CM, Liechty ZS, Nguyen B, Lurie E, Eason S, Phillips G,  
514 Sundaresan V. 2018. Compositional shifts in root-associated bacterial and archaeal microbiota  
515 track the plant life cycle in field-grown rice. *PLoS Biol* 16:1–28.
- 516 45. Ginnan NA, De Anda NI, Vieira FCF, Rolshausen PE, Roper MC. 2022. Microbial Turnover  
517 and Dispersal Events Occur in Synchrony with Plant Phenology in the Perennial Evergreen Tree  
518 Crop Citrus sinensis. *MBio* 13.
- 519 46. Bei Q, Moser G, Müller C, Liesack W. 2021. Seasonality affects function and complexity but  
520 not diversity of the rhizosphere microbiome in European temperate grassland. *Sci Total Environ*  
521 784:147036.
- 522 47. Moe LA. 2013. Amino acids in the rhizosphere: From plants to microbes. *Am J Bot* 100:1692–  
523 1705.
- 524
